# Supplementary material for: Controlled synthesis and size-dependent thermal conductivity of Fe3O4magnetic nanofluids
Source: Royal Society of Chemistry journal article supplement (doi:10.1039/c1dt11222h), 2011-11-16
Supplement: c1dt11222h.pdf [file c1dt11222h.pdf]

# Controlled Synthesis and Size-Dependent Thermal Conductivity of $\text{Fe}_3\text{O}_4$ Magnetic Nanofluids

Baodui Wang<sup>†, ||</sup>, Baogang Wang<sup>†</sup>, Pengfei Wei<sup>†</sup>, Xiaobo Wang<sup>†,\*</sup> and Wenjing Lou<sup>†,\*</sup>

<sup>†</sup> State Key Laboratory of Solid Lubrication, Lanzhou Institute of Chemical Physics, Chinese Academy of Sciences, Lanzhou 730000, People's Republic of China, <sup>||</sup> Key Laboratory of Nonferrous Metal Chemistry and Resources Utilization of Gansu Province, Lanzhou University Gansu, Lanzhou, 730000 (P.R. China)

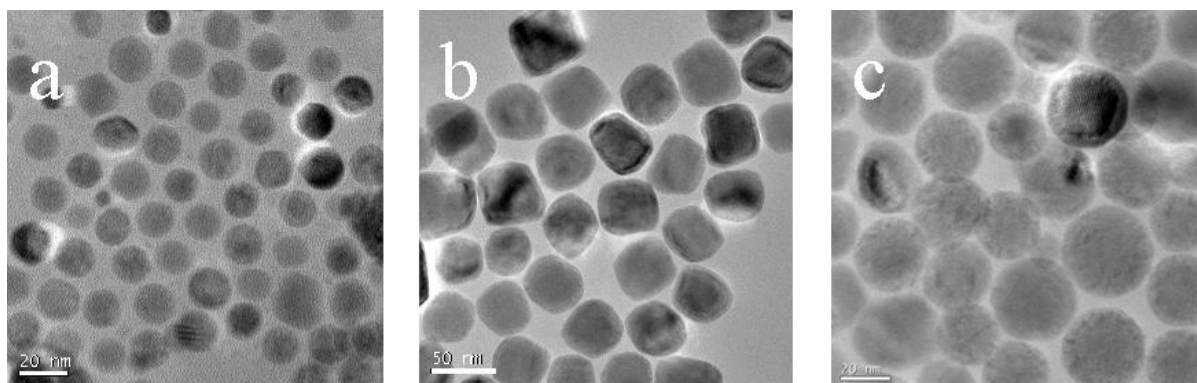

Figure S1. TEM images of  $\text{Fe}_3\text{O}_4$  NPs: (a)  $\sim 16$  nm (0.36 g,  $\text{Fe}(\text{acac})_3$ ), (b)  $\sim 38$  nm (5.40g,  $\text{Fe}(\text{acac})_3$ ), and (c)  $\sim 30$  nm (7.20 g,  $\text{Fe}(\text{acac})_3$ ).

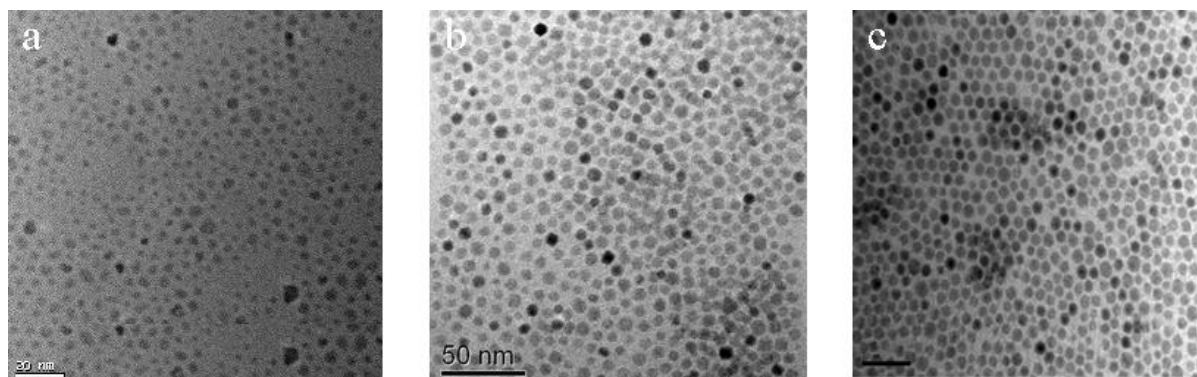

Figure S2. TEM images of  $\text{Fe}_3\text{O}_4$  NPs: (a) ~4 nm, (b) ~6 nm, and (c) ~10 nm.

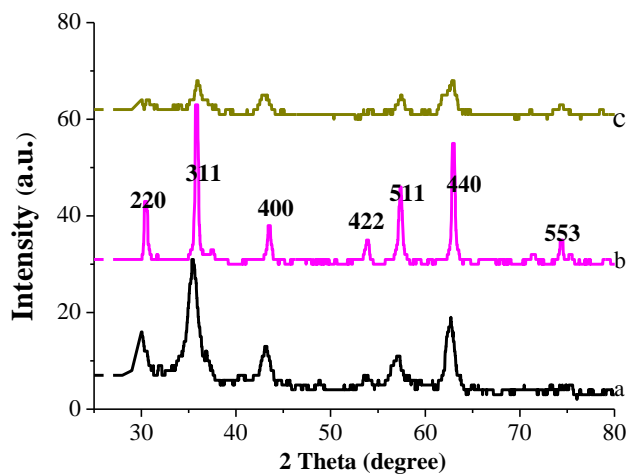

Figure S 3. XRD patterns of  $\text{Fe}_3\text{O}_4$  NPs: (a) ~16 nm (0.36 g,  $\text{Fe}(\text{acac})_3$ ), (b) ~38 nm (5.40g,  $\text{Fe}(\text{acac})_3$ ) and (c) ~30 nm (7.20 g,  $\text{Fe}(\text{acac})_3$ ).

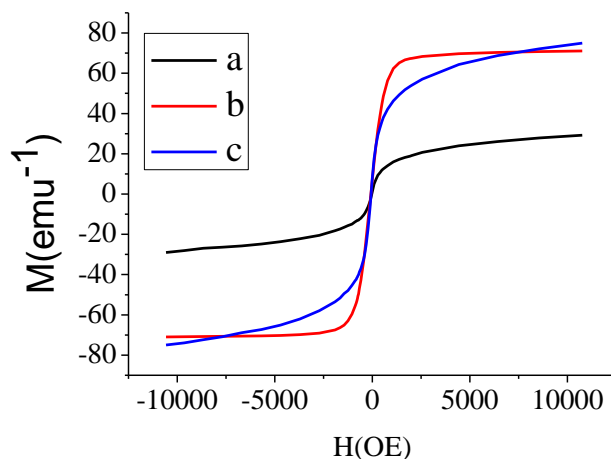

Figure S4. Magnetic hysteresis loops of (a) ~16 nm, (b) ~38 nm, and (c) ~30 nm  $\text{Fe}_3\text{O}_4$  NPs measured at 298 K.

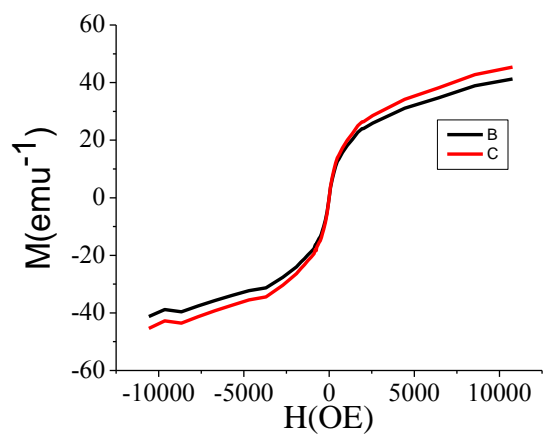

Figure S5. Magnetic hysteresis loops of ~16 nm Fe<sub>3</sub>O<sub>4</sub> NPs (B) before heated (C) after heated at 100°C measured at 298 K.

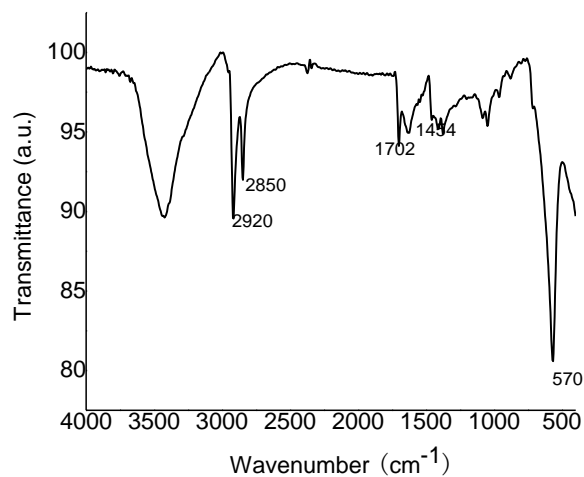

Figure S6. FT-IR spectra of the as-synthesized Fe<sub>3</sub>O<sub>4</sub> nanoparticles.

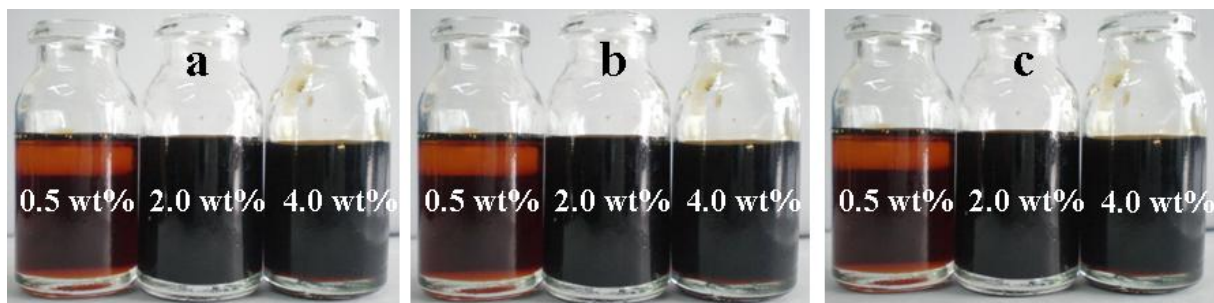

Figure S7. Stability of nanofluids containing Fe<sub>3</sub>O<sub>4</sub> NPs: (a) stay 1 month, (b) stay 2 months and (b) stay 5 months.
